# 1 **Sex-determination and sex chromosomes are shared across the** 2 **radiation of dioecious *Nepenthes* pitcher plants**

3  
4 Mathias Scharmann<sup>1\*</sup>, T. Ulmar Grafe<sup>2</sup>, Faizah Metali<sup>2</sup> and Alex Widmer<sup>1</sup>

5  
6 <sup>1</sup>Institute of Integrative Biology, ETH Zurich, Universitätstrasse 16, 8092 Zürich, Switzerland

7 <sup>2</sup>Faculty of Science, Universiti Brunei Darussalam, Tungku Link, Gadong BE 1410, Brunei  
8 Darussalam

9  
10 \*Author for Correspondence: Mathias Scharmann, Institute of Integrative Biology, ETH

11 Zurich, Universitätstrasse 16, 8092 Zürich, Switzerland, Tel: +41 44 632 54 82, Fax: +41 44

12 632 14 63, Email: mathias.scharmann@env.ethz.ch

## 13 14 **Abstract**

15 Plants with separate sexes (dioecy) represent a minority but dioecy has evolved multiple times

16 independently in plants. Our understanding of sex determination systems in plants and of the

17 ecological factors and molecular changes associated with the evolution of dioecy remain

18 limited. Here, we study the sex-determination system in dioecious plants that lack

19 heteromorphic sex chromosomes and are not amenable to controlled breeding: *Nepenthes*

20 pitcher plants. We genotyped wild populations of flowering males and females of three

21 *Nepenthes* taxa using ddRAD-seq, and sequenced a male inflorescence transcriptome. We

22 developed a novel statistical tool (privacy rarefaction) to distinguish true sex-specificity from

23 stochastic noise in high-throughput sequencing data. Our results support XY-systems in all

24 three *Nepenthes* taxa and in *Silene latifolia* which was used as a positive control for its known

25 XY-system. The male-specific region of the Y chromosome showed little conservation among  
26 the three *Nepenthes* taxa, except for the essential pollen development gene DYT1 which was  
27 also male-specific in additional taxa. Hence, this homomorphic XY sex-determination system  
28 likely has a unique origin older than the crown of the genus *Nepenthes* at c. 17.7 My. In  
29 addition to the characterisation of the previously unknown sex chromosomes of *Nepenthes*,  
30 our work contributes an innovative, highly sensitive statistical method to efficiently detect  
31 sex-specific genomic regions in wild populations in general.

32

### 33 **Key words**

34 privacy rarefaction, dioecy, molecular sexing, sex chromosome discovery, sex-specific loci,  
35 sex-determination

36

37

38

39

40

41

42

43

44

45

46

47

48

49

## 50 **Introduction**

### 51 **Dioecy and sex chromosomes**

52 Although the majority of flowering plant species have hermaphroditic flowers, plant sexual  
53 systems and mechanisms of sex-determination are highly diverse (Charlesworth 2002;  
54 Bachtrog et al. 2014). Only 5-6% of species have female and male flowers on separate  
55 individuals (dioecy), while the evolutionary transition to dioecy occurred more than 800 times  
56 independently in angiosperms alone (Renner 2014). In contrast to the outcrossing–selfing  
57 transition, for which many of the underlying genetic changes have recently been uncovered  
58 (Shimizu & Tsuchimatsu 2015), relatively little is known about the transitions from  
59 hermaphroditism to dioecy and the mechanisms of sex-determination in plants (Charlesworth  
60 2016). The main hypotheses for the evolution of separate sexes in plants involve conflicting  
61 trait optima between the sexual functions, or alternatively, an outcrossing advantage  
62 (Charlesworth 1999).

63 Sex chromosomes are one of the potential determinants of sex. Pairs of sex  
64 chromosomes control sex at the individual level, and differ from autosomes mainly in their  
65 partial loss of meiotic recombination, and because one of them is limited to one of the sexes  
66 (Charlesworth 2016). Some sex chromosome pairs are heteromorphic in karyotypes, while  
67 others are homomorphic. Few plant sex-determination systems and sex chromosomes have  
68 been studied in detail (Ming et al. 2011), and even fewer of these originated independently.  
69 This severely limits comparative studies aiming to understand the incidence and stability of  
70 sex chromosomes in the tree of life (The Tree of Sex Consortium 2014) and the identification  
71 of universal patterns in their evolution and structure. Beyond fundamental evolutionary  
72 questions, knowledge of sex-determination systems also has important applications for  
73 example in molecular gender phenotyping of juvenile plants in agriculture, plant breeding,  
74 and conservation.

75           This study aimed to develop and apply a novel and robust method to characterise sex-  
76   determination systems, unravel the sex-determination system of *Nepenthes* pitcher plants, and  
77   investigate biological questions related to the origin of dioecy in this genus.

## 78   **Study system**

79   *Nepenthes* (Nepenthaceae, Caryophyllales) comprises c. 140 taxa of perennial vines and  
80   shrubs (Cheek & Jebb 2001; McPherson 2009) occurring mostly in Southeast Asia (Clarke  
81   1997). All species are carnivorous plants which supplement their nutrient budget by killing  
82   and digesting insects (among other prey), enhancing growth and flowering (Pavlovič &  
83   Saganová 2015; Moran & Moran 1998). The complex physiology of carnivory takes place in  
84   modified, jug-shaped leaves called pitchers (Juniper et al. 1989; Moran & Clarke 2010).

85           All *Nepenthes* are dioecious and hermaphrodites are not documented, while the closest  
86   relatives, families Ancistrocladaceae, Dioncophyllaceae, Droseraceae, and Drosophyllaceae  
87   (Cuénoud et al. 2002; Renner & Specht 2011) are entirely hermaphroditic. Sexual  
88   dimorphism in *Nepenthes* could be restricted to the reproductive structures (Kaul 1982), but  
89   other traits lack study. Male and female flowers (Figure 1a) are highly diverged because  
90   alternative reproductive organs abort early in development (Subramanyam & Narayana 1971).  
91   Inflorescences generally share the same structure in males and females (raceme, panicle), but  
92   may differ in tepal colouration and shape, peduncle and rachis length (reviewed in Supporting  
93   Information (SI) Table S1; Clarke, 1997, 2001, McPherson, 2009, 2011; Clarke *et al.*, 2011;  
94   described for only 46 of 138 taxa), and nectar production (Frazier 2001; Kato 1993). Male  
95   inflorescences bear in general more flowers (Frazier 2001). Sexual dimorphism in ecology  
96   (Barrett & Hough 2013) may exist in *Nepenthes*: In disturbed habitats, adult *N. gracilis* and  
97   *N. rafflesiana* were strongly male-biased under open canopy (83% and 100% male  
98   individuals, respectively) but were slightly female-biased under closed canopy (34% and 40%

99 males; Frazier 2001), consistent with the hypothesis that males tolerate drier and hotter  
100 conditions.

101 The sex-determination mechanism in *Nepenthes* is unknown, but there are no reports  
102 of plasticity or reversal of the gender in nature or cultivation (Clarke 2001), suggesting stable  
103 sex determination during early development, or a genetic basis. Heteromorphic sex  
104 chromosomes are unlikely since a wide range of species share indistinguishably small and  
105 uniform chromosomes ( $2n=80$ ; Heubl & Wistuba 1997).

### 106 **Analysis of sex-determination systems**

107 Cytogenetics and linkage analysis in families are traditional methods to study sex-  
108 determination and sex linkage of genes (Charlesworth & Mank 2010). However, these  
109 strategies fail in many dioecious organisms because of uninformative karyotypes and  
110 prohibitive logistics of breeding. Here we avoid cytology and controlled crosses by instead  
111 scanning natural populations for associations between sex and genetic markers.

112 Two main categories describe molecular genetic sex differences (sex-linkage): sex-  
113 association and sex-specificity. Sex-associated loci differ in allele frequency between sexes,  
114 and either directly determine sex, for example in polygenic sex-determination systems  
115 (reviewed in Bachtrog et al. 2014), or display linkage disequilibrium (LD) with sex-  
116 determining loci. Sex-specific loci are private to one sex and entirely absent from the other.  
117 They indicate partial divergence between male and female genomes, likely following  
118 recombination suppression around sex-determining loci (Charlesworth 1991). Pairs of sex  
119 chromosomes can be classified as either heteromorphic or homomorphic. In the former,  
120 cytogenetic (optical) techniques indicate chromosome divergence in size or structure, whereas  
121 in the latter the differences are so subtle that molecular genetic methods are required to  
122 resolve them. Male-limitation is referred to as XY-heterogamety and female-limitation as

123 ZW-heterogamety. Sex-specific regions of Y or W chromosomes occur as single copies  
124 (haploid, hemizygous) in diploid tissue.

125 Genomes of both natural and cultivated populations may be scanned for sex  
126 differences. Candidate sex-associated or sex-specific loci are expected to display strong  
127 mutual LD, and reduced genetic diversity relative to autosomal regions (Wilson Sayres et al.  
128 2014). Lack of candidate loci may indicate either non-genetic (environmental) sex-  
129 determination, a very small sex-specific region, or multi-locus sex-determination. To date,  
130 few studies have used population genetics to unravel sex-determination systems and identify  
131 sex-linked loci without pedigrees. Indeed, chances to find a potentially small sex-linked  
132 region with few markers in a large genome are poor. Noteworthy exceptions include the  
133 discovery of a sex-specific microsatellite locus in European tree frogs, revealing males as  
134 heterogametic in this species (Berset-Brändli et al. 2006). However, marker availability is no  
135 longer limiting since the development of restriction site associated DNA sequencing ("RAD-  
136 seq" and related methods; Elshire et al. 2011; Peterson et al. 2012; Baird et al. 2008). These  
137 methods successfully identified sex-linked markers and sex-determination systems without  
138 pedigrees in diverse organisms such as Crustaceans (Carmichael et al. 2013), *Anolis* lizards  
139 (Gamble & Zarkower 2014), and moore frogs (Brelsford et al. 2017).

140 Several studies have reported apparent sex-specific loci in both sexes (Gamble &  
141 Zarkower 2014; Bewick et al. 2013; Heikrujam et al. 2015; Brelsford et al. 2017). However, it  
142 is generally expected that there exists only one sex-specific chromosome and only one  
143 heterogametic sex. Even in the unusual XYW system (Orzack et al. 1980) or XY-ZW  
144 transitional phases (Sander van Doorn & Kirkpatrick 2010), only one sex has a private  
145 (dominant) sex chromosome. The paradoxical reports may represent false positives, a  
146 problem exacerbated in RAD-seq data with their highly stochastic genotype presence–  
147 absence polymorphisms (Mastretta-Yanes et al. 2015). As noted by previous authors (Gamble

148 & Zarkower 2014; Gamble et al. 2015), the rate of false positive sex-specific loci decreases  
149 the more males and females are compared, but true positives may be lost at an even higher  
150 rate. There exists so far no solution to this quality–quantity trade-off.

## 151 **Aims of the study**

152 We investigated the unknown sex-determination system of dioecious *Nepenthes* pitcher plants  
153 and examined whether sex chromosomes across their radiation are derived from a single pair  
154 of ancestral autosomes. We developed a statistical procedure that allows distinguishing  
155 between true sex-specificity and stochastic absence, and applied this approach to *Nepenthes*.  
156 Specifically, we addressed the following questions:

157 (1) Are there sex-specific and sex-associated RAD-tags in *Nepenthes*? (2) Do sex-specific and  
158 sex-associated RAD-tags conform to theoretical population genetic expectations? (3) Are sex-  
159 specific and sex-associated regions shared among different *Nepenthes* species? (4) Do these  
160 regions contain expressed genes that may contribute to differences between the sexes?

161 Based on our results we further developed a molecular sexing assay for *Nepenthes*. This tool  
162 is suitable for identifying the sex of juveniles and non-flowering adult plants in ecological  
163 research, conservation and horticulture.

## 164 **Materials and Methods**

### 165 **Sampling, ddRAD-seq and genotyping**

166 Samples genotyped by ddRAD-seq (Peterson et al. 2012) and used for this study are shared  
167 with those used by Scharmann *et al* (in revision), and we refer readers to this publication for  
168 specific details. In brief, natural populations of *Nepenthes* were sampled in Brunei  
169 Darussalam (Borneo), Singapore, and the Seychelles. Genomes were Illumina-sequenced in  
170 strongly reduced form by focussing on DNA restriction fragments (two enzymes). RAD-tags  
171 (contigs) were *de novo* assembled by clustering reads, followed by mapping, genotype calling  
172 and quality filtering. Scans for sex-specific and sex-associated markers were conducted

173 separately on three taxa: *N. pervillei* Blume (28 males and 22 females from six populations on  
174 Mahé), *N. gracilis* Korth. (ten males and ten females from one population in Brunei), and *N.*  
175 *rafflesiana sensu lato* (in total 39 males and 22 females combined from four populations). We  
176 here define *N. rafflesiana s.l.* as *N. rafflesiana* Jack from Singapore (ten males, four females)  
177 and the Bornean entities *N. rafflesiana* "typical form" (twelve males, six females), *N.*  
178 *rafflesiana* "giant form" (Clarke 1992, 1997; five males, three females) and *N. hemsleyana*  
179 Macfarlane (Scharmann & Grafe 2013; eleven males, eight females).

180 The sex of individual was established on the basis of fresh or dry inflorescences, or  
181 else molecularly using a preliminary sexing assay for *N. rafflesiana s.l.* (SI Methods S1). To  
182 increase the phylogenetic range of our study and to validate molecular sexing, we furthermore  
183 included individuals of known sex for additional species from the field, and species that  
184 flowered in cultivation (table in SI Methods S4). Fresh leaf material was stored in a nucleic  
185 acid preserving buffer (Camacho-Sanchez et al. 2013) until further use.

186 To validate our method for detection of sex-specific markers, we also genotyped  
187 several individuals of *Silene latifolia* Poiret, a species with a known XY sex-determination  
188 system and heteromorphic sex chromosomes. Details of *Silene* sampling and genotyping are  
189 provided in SI Methods S2.

#### 190 **Detection of sex-specific RAD-tags**

191 We define sex-specific RAD-tags as mapping sequencing reads from one of the sexes  
192 exclusively. The number and identity of sex-specific RAD-tags both carry uncertainties  
193 because they depend on the number and identity of male and female individuals compared.  
194 We evaluated these uncertainties by resampling methods, separately for each of three  
195 *Nepenthes* taxa and *Silene latifolia*. Sex-specificity was tested quantitatively, i.e. for deviation  
196 of the observed number of sex-specific RAD-tags from zero, and qualitatively for each RAD-  
197 tag.



198 Unbiased comparisons among data sets with different numbers of individuals and sex  
199 ratios were achieved by subsampling male and female individuals such that a 1:1 sex ratio  
200 was maintained. To capture the uncertainty over different combinations of individuals, we  
201 bootstrapped without replacement for each possible subsample size 200 random sets of males  
202 and females. In the quantitative tests, we counted sex-specific RAD-tags for each  
203 combination. This generated two distributions, the bootstrapped observed male- and female-  
204 specific RAD-tag counts. Then, these two distributions were separately compared to a null  
205 distribution derived from permutations of the sexes. The null distribution estimates how many  
206 RAD-tags would appear to be sex-specific if the individuals were interchangeable, i.e. if there  
207 were no true sex-specific RAD-tags. We calculated a  $p$ -value as the proportion of permuted  
208 sex-specific counts equal to or larger than the mean of the observed male- resp. female-  
209 specific count distribution.

210 The qualitative test assessed the confidence in sex-specificity for each locus. We again  
211 bootstrapped 200 random sets of males and females without replacement from the available  
212 individuals, for each possible subsample size. Then, we counted for each locus in how many  
213 of the bootstrapped male–female comparisons it emerged as sex-specific. True sex-specific  
214 RAD-tags are expected to appear more frequently in such comparisons than false positives  
215 whose occurrence is random. The bootstrap support value for sex-specificity is the count  
216 divided by the number of bootstraps. We only reported RAD-tags with 50% or higher  
217 bootstrap support.

218 We named this algorithm privacy rarefaction and implemented it in a multithreading  
219 python script that calls samtools (Li et al. 2009) to read mapping data from .bam alignments  
220 (will be available at <https://github.com/mscharmman/>).

221 **Detection of sex-associated SNPs**

222 We conducted chi-squared tests on frequency counts for all bi-allelic SNPs versus sex in  
223 PLINK v.1.07 (Purcell et al. 2007). Maximum 25% absent genotypes were tolerated per SNP,  
224 and candidate SNPs were accepted as sex-associated at a false discovery rate (Benjamini &  
225 Hochberg 1995) smaller or equal to 0.05.

### 226 **Population genetics of candidate RAD-tags**

227 We tested whether LD in male populations differed between sex-specific resp. sex-associated  
228 SNPs and the genomic average, represented by 100 randomly selected SNPs. LD ( $r^2$ ) was  
229 calculated between but not within RAD-tags using VCFtools v0.1.15 (Danecek et al. 2011).  
230 The same contrasts were made for nucleotide diversity  $\pi$ , which was averaged per RAD-tag  
231 using SNPs from .vcf genotypes (VCFtools) while the total number of observed sites per  
232 RAD-tag was taken from .bam alignments, applying the same filters to both data (minimum  
233 read depth 3, maximum read depth 75, maximum genotype absence 0.25). Significance of  
234 differences was evaluated by a randomisation test in R (bootstrap resampling from observed  
235 data at equal sample sizes, permutation of observations;  $p$ -value = proportion of resampled  
236 datasets with difference in means greater or equal to the observed difference; 100k replicates).

### 237 **Comparison of candidate RAD-tags to a male inflorescence transcriptome**

238 We sequenced and assembled the transcriptome of a developing male inflorescence of  
239 *Nepenthes khasiana* Hook.f. (SI Methods S3) to identify and annotate sex-linked candidate  
240 loci. Fresh inflorescences of the species used for ddRAD-seq were not available in  
241 cultivation. The transcriptome was searched (a) by BLAST for similarity to candidate RAD-  
242 tags (thresholds  $\geq 90$  aligned bases and  $\geq 75\%$  identity), and (b) by repeating privacy  
243 rarefaction with ddRAD-seq reads directly mapped to the transcriptome rather than the  
244 ddRAD-seq assembly (bwa mem; Li 2013; not filtering mapping quality, allowing multiple  
245 mappings).

246 Candidate transcripts from both approaches were annotated by BLAST search against  
247 NCBI Genbank nt (version as of Nov 7, 2016), and NCBI Genbank nr (version as of Mar 26,  
248 2016). Transposable elements were detected using RepeatMasker 4.0.6 (Smit et al. 2013) v.  
249 20150807 (Eukaryota). Proteins with at least 50 amino acids were predicted by TransDecoder  
250 (Trinity package) and annotated against NCBI Genbank nr, UniProt Swiss-Prot (version as of  
251 Aug 17, 2016), and *Arabidopsis thaliana* proteins in UniProtKB (version as of Apr 3, 2016).  
252 PFAM domains were detected using hmmer 3.1b1 (Eddy et al.). Database hits were accepted  
253 at e-value  $\leq 10^{-5}$ .

#### 254 **PCR validation**

255 Candidate sex-specific RAD-tags were chosen for PCR validation based on a ranking of the  
256 highest stringency level reached, bootstrap support, taxonomic overlap, and the quality of  
257 annotation of matching transcripts. PCR primers were designed in Geneious R6 (Biomatters  
258 Ltd., Auckland, New Zealand). PCR reactions were performed in 15  $\mu$ l volumes containing  
259 2.5 mM MgCl<sub>2</sub>, 250  $\mu$ M of each dNTP, 0.375 units of GoTaq DNA polymerase (Promega,  
260 Wisconsin, USA), 1x GoTaq Flexi buffer (Promega), 0.5  $\mu$ M of each primer, and 1  $\mu$ l of  
261 template DNA (2-20 ng/ $\mu$ l). After initial denaturation for 2 min at 95°C, 30 cycles were run  
262 with denaturation at 95°C for 30s, annealing at 50°C for 30s, and extension at 72°C for 1 min,  
263 followed by a final extension step of 5 min at 72°C (Labcycler, SensoQuest, Göttingen,  
264 Germany). PCR products (2  $\mu$ l) were separated by electrophoresis in a 2% agarose gel and  
265 visualised through fluorescent staining (GelRed, Biotium Inc., Hayward, CA, USA).

## 266 **Results**

### 267 **Sex-specific RAD-tags**

268 Qualitatively consistent signatures of male-specific RAD-tags were detected independently in  
269 *N. pervillei*, *N. gracilis*, *N. rafflesiana s.l.*, and *Silene latifolia* (Figure 1b). Numbers of  
270 candidate RAD-tags decreased monotonically with subsampling size. This drop in number of

271 shared RAD-tags with increasing number of samples is an inherent and typical property of  
272 RAD-seq data, which have large genotype absence caused by a combination of restriction site  
273 mutations and stochasticity during library preparation, Illumina sequencing, and  
274 bioinformatics (reviewed in Mastretta-Yanes et al. 2015).

275 The evolutionary plant model for dioecy associated with an XY sex-determination  
276 system, *Silene latifolia*, constitutes a positive control for the identification of male-specific  
277 RAD-tags since it contains a well-differentiated Y-chromosome. Simultaneously, *S. latifolia*  
278 provides a negative control for a ZW-system as evidenced by the decay of false positive  
279 female-specific RAD-tags with increasing stringency (subsample size) in all four taxa.

#### 280 **Sex-associated SNPs**

281 We detected bi-allelic SNPs associated with the phenotypic sex in *N. pervillei* and *N.*  
282 *rafflesiana s.l.*, as well as in *Silene latifolia*, but not in *N. gracilis*. Almost all sex-associated  
283 SNPs had an allele frequency close to 0.5 and near-complete heterozygosity in males, but  
284 were close to fixation and thus homozygous in females (SI Table S2). The proportion of sex-  
285 associated bi-allelic SNPs identified was much lower in *Nepenthes* (*N. pervillei*:  
286 97/38,783=0.25%; *N. rafflesiana s.l.*: 37/222,188=0.017%; *N. gracilis*: 0/50,483=0%) than in  
287 *S. latifolia* (2,376/149,311=1.6%).

#### 288 **LD among sex-specific RAD-tags and sex-associated SNPs**

289 Sex-specific and sex-associated genomic regions are expected to experience little or no  
290 recombination, which should lead to increased LD. Contrary to expectations, LD among sex-  
291 specific RAD-tags did not differ from the genomic background ( $p = 0.74$ ) in *N. pervillei*,  
292 whereas mean LD among SNPs in sex-associated RAD-tags was elevated by 0.077 units over  
293 the genomic background ( $p \leq 10^{-5}$ ). In *N. rafflesiana s.l.*, mean pairwise  $r^2$  among SNPs  
294 located in sex-specific RAD-tags was 0.1 units higher than in the genomic background ( $p \leq$   
295  $10^{-5}$ ), whereas LD among sex-associated RAD-tags was only slightly higher than the genomic

296 background (c. 0.004 units,  $p = 0.0011$ ). These tests could not be conducted for *N. gracilis*  
297 because no sex-associated RAD-tags were identified and only two sex-specific RAD-tags  
298 contained SNPs ( $r^2 = 0.15625$ ).

### 299 **Nucleotide diversity of sex-linked RAD-tags**

300 Mean  $\pi$  in male-specific RAD-tags tended to be lower than the genomic background in all  
301 three taxa (Figure 1c). This difference was significant for *N. rafflesiana s.l.* ( $p = 0.0005$ ), but  
302 not for *N. pervillei* and *N. gracilis* ( $p = 0.11$  and  $p = 0.065$ , respectively). In contrast, mean  $\pi$   
303 in sex-associated RAD-tags in males was increased over the genomic background for both *N.*  
304 *pervillei* ( $p \leq 10^{-5}$ , Figure 1c) and *N. rafflesiana s.l.* ( $p = 0.0043$ ; Figure 1c).

### 305 **Shared candidate loci between species, functional annotations and PCR validation**

306 We recovered six shared candidate sex-specific RAD-tags at stringency level  $\geq 5$  in both *N.*  
307 *gracilis* and *N. rafflesiana s.l.*, whereas *N. pervillei* shared no candidates with either (SI Table  
308 S3). There was no overlap in sex-associated SNPs between the *Nepenthes* species, and no  
309 direct overlap between sex-specific RAD-tags and those with sex-associated SNPs. However,  
310 one male-specific RAD-tag of *N. gracilis* and one RAD-tag with sex-associated SNPs of *N.*  
311 *rafflesiana s.l.* both matched with high confidence to the same inflorescence transcript  
312 containing a DUF4283 (domain of unknown function, <http://pfam.xfam.org/family/PF14111>,  
313 09.11.2016).

314 One male-specific RAD-tag of *N. pervillei* aligned to the transcript of a bHLH  
315 transcription factor, and the best matches in all accessed databases were consistently to  
316 predicted orthologs of the *Arabidopsis* gene DYSFUNCTIONAL TAPETUM 1 (DYT1). A  
317 further sex-associated RAD-tag of *N. pervillei* matched a transcript annotating as *A. thaliana*  
318 SEPALLATA-1 (SEP1). This RAD-tag aligned to the predicted 3'-UTR of the putative  
319 SEP1-ortholog, and contained two SNPs which were both homozygous in 95% of females  
320 and heterozygous in 96% of males. However, further comparisons of putative X–Y

321 divergence of *SEP1* were not possible because the male inflorescence transcriptome reads  
322 were not heterozygous. In *N. gracilis*, a male-specific RAD-tag matched a long transcript  
323 similar to a mitochondrial NADH-ubiquinone oxidoreductase from *Beta vulgaris* (Swiss-  
324 Prot). All further candidate loci contained either traces of transposable elements, or no known  
325 sequence motifs (SI Table S3).

326 Complementary to the sex-specificity scan on the ddRAD-*de novo* reference, we  
327 repeated privacy rarefaction by directly mapping the ddRAD reads to the male inflorescence  
328 transcriptome, with the aim to recover further annotated candidate genes. This approach  
329 identified seven transcripts as male-specific in at least one species (SI Table S3). We  
330 considered only high-confidence male-specific candidate transcripts, reaching at least  
331 stringency level four and bootstrap support greater 0.5 in at least one species. No female-  
332 specific transcripts (false positives) reached this stringency. A single transcript was male-  
333 specific in *N. rafflesiana s.l.* but could not be annotated. Four close transcript “isoforms”  
334 (Trinity assembler) were male-specific in both *N. gracilis* and *N. rafflesiana s.l.*, but they  
335 lacked similarity to any known motif except for one isoform similar to a Jockey-1\_Drh  
336 retrotransposon. However, two transcripts were male-specific in both *N. pervillei* and *N.*  
337 *rafflesiana s.l.*, and one of these also matched a *N. pervillei* male-specific RAD-tag (see  
338 above). These two transcripts appear to be close isoforms (putative intron presence–absence),  
339 and both annotated as DYT1 (see above).

340 We tested by PCR whether the putative DYT1-ortholog is male-specific in a broad  
341 range of *Nepenthes* species. A single PCR product of approximately 290 bp length was  
342 observed exclusively and consistently in phenotypically sexed male *Nepenthes* but never in  
343 females (SI Methods S4). We tested multiple males and females (1 vs. 3 to 3 vs. 3) for eight  
344 taxa, and 1-2 individuals from 14 further taxa. Presence–absence of the PCR product was  
345 fully consistent with the phenotypic sex of all tested individuals (n=56). Sanger sequencing of

346 the PCR product confirmed the identity of the target region. Hence, this locus is male-specific  
347 across a phylogenetically broad range of *Nepenthes* species and can be used for molecular  
348 sexing of individuals.

## 349 **Discussion**

### 350 **The *Nepenthes* sex-determination system**

351 In natural populations of *Nepenthes* we discovered both sex-associated markers that were  
352 predominantly heterozygous and displayed high nucleotide diversity in males but were mostly  
353 homozygous in females, as well as multiple male-specific markers displaying elevated LD  
354 and reduced nucleotide diversity. The latter is consistent with theoretical expectations for sex-  
355 specific loci, which are hemiploid and have only 1/4 (assuming equal sex ratio) of the  
356 effective population size compared to the autosomal genome. Both patterns can arise and  
357 persist in interbreeding populations as a consequence of physical linkage to sex-determining  
358 loci, (partial) cessation of recombination in the MSY, and X–Y divergence. Together, these  
359 findings reveal a genetic basis of sex-determination in *Nepenthes* spp. in which males are the  
360 heterogametic sex, i.e. an XY-system. Our interpretations are supported by congruent patterns  
361 inferred in the well-known XY-heterogametic *Silene latifolia*.

### 362 **Method to extract sex-specific loci from population genotype data**

363 Methods to rapidly genotype individuals across the genome, such as RAPDs, AFLPs, and  
364 more recently RNA-seq and ddRAD-seq were repeatedly used to identify sex-specific  
365 markers. All these approaches suffer from the common problem that marker absence in some  
366 individuals (e.g. due to polymorphism, low coverage or technical artefacts) must be  
367 distinguished from true marker absence in the entire sex. Erroneous inference of marker  
368 absence in one sex leads to false positive sex-specific markers for the other sex. This likely  
369 played a role in studies reporting both male- and female-specific markers in single

370 populations (Gamble & Zarkower 2014; Bewick et al. 2013; Heikrujam et al. 2015; Brelsford  
371 et al. 2017).

372         Theoretical expectations for fully dioecious diploids in quasi-panmixia imply that a  
373 population can not harbour both male- and female specific loci at the same time. Under these  
374 assumptions, at most one sex, or else none, carries sex-specific alleles or loci as derived from  
375 the principles of diploid inheritance (Mendel 1866): If sex is determined by a single locus,  
376 here not understood as a single gene but more broadly as a non-recombining DNA sequence  
377 that may contain any number of genes, it must follow dominant-recessive inheritance (where  
378 absence constitutes a recessive allele). Co-dominance can be excluded because it would  
379 produce hermaphrodites or steriles, violating the assumption of a fully dioecious population.  
380 Consequently, all loci that are not perfectly physically linked to the sex-determining locus are  
381 expected to be shared by both sexes, and sex-specific loci and alleles must be located in a  
382 single, non-recombining genomic block that includes a dominant sex-determining allele. If  
383 sex is controlled by more than one locus, as in quantitative or polygenic sex-determination,  
384 however, by definition no single locus or allele controls sex, and hence all loci and alleles are  
385 expected to be shared by both sexes.

386         We argue that erroneous inference of marker absence, and thus false positive  
387 identification of sex-specific markers, results from insufficient consideration of uncertainty in  
388 presence–absence within and between sexes. This includes sex bias in both sample size and  
389 genetic structure of the screened population. We eliminated this problem through replicated  
390 downsampling from a larger pool of observations (individuals) in the same way as rarefaction  
391 in community ecology eliminates sampling bias when comparing species richness (Gotelli &  
392 Colwell 2001). However, instead of the resampled counts in two groups (habitats), we record  
393 the identity and level of sharing (or privacy) between groups (sexes), which is not of interest  
394 in conventional rarefaction analysis. As a result, privacy rarefaction curves, as we name them



395 here, decay rather than increase towards a plateau with increasing sub-sample size  
396 (=stringency). An empirical statistical solution to differentiate between random and true  
397 privacy of genomic loci, like the one detailed here, has to our knowledge not been applied  
398 before (but see Schlüter & Harris 2006; Szpiech et al. 2008; Kalinowski 2004 for applications  
399 in genetic fingerprinting and diversity estimation).

400 Previous approaches to detect sex-specific loci from wild populations sequenced  
401 several males and females and then scored which loci are absent from all males and present in  
402 all females, and vice-versa. Naïvely, the scoring is done once with all individuals together,  
403 frequently with different sample sizes for males and females. Although biologically plausible  
404 results are sometimes obtained (e.g Utsunomia et al. 2017), many studies report sex-specific  
405 markers for both sexes (Gamble & Zarkower 2014; Bewick et al. 2013; Heikrujam et al.  
406 2015; Brelsford et al. 2017). These results evidently contain artefacts because they do not  
407 conform to the Mendelian expectation that only one of the sexes can harbour sex-specific loci.  
408 Thus, results for one sex are exclusively false positives, whereas results for the other sex may  
409 encompass both true and false positives. To distinguish true from false positives, researchers  
410 then typically attempt to validate many candidate loci by PCR in reference populations. Here,  
411 we report that the problem can partially be solved in-silico by our novel privacy rarefaction  
412 algorithm. It removes false-positives and assigns a quality score to each candidate locus, thus  
413 greatly reducing the number of candidate sex-specific markers to validate.

414 Our use of privacy rarefaction for the inference of sex-specificity aims at identifying  
415 the most likely true-positive candidates in noisy datasets, at the possible cost of a high false-  
416 negative rate. Privacy rarefaction curves are illustrated in Fig. 1. In these, false-positive  
417 candidates are evident: If apparent sex-specific loci are identified in both sexes (typically at  
418 low stringency), then false-positives are present in at least one of the sexes. This happens  
419 when too few males and females are compared, e.g. at two males versus two females we

420 typically obtained tens of thousands of sex-specific candidates, most of which were false-  
421 positives. These false-positives appeared sex-specific because they were not present in the  
422 dataset in all individuals, due to technical artifacts, low coverage or molecular  
423 polymorphisms, and they by chance coincided with sex. Thus, different combinations of few  
424 males and few females yield large but inconsistent sets of sex-specific candidates, most of  
425 which will be false-positives. With increasing numbers of males and females, false-positives  
426 are progressively eliminated as the collective male- resp. female sets of loci approach the real  
427 genomic composition of males resp. females. Different combinations of many males and  
428 many females yield small but largely consistent sets of sex-specific candidates. This happened  
429 in our experience from c. ten males and females upwards, and our script reports this  
430 consistency as a bootstrap support value. The dropout of false-positives characterises the  
431 initial steep decay of the privacy rarefaction curves and continues until only one sex contains  
432 specific loci. This is a critical point which is diagnostic for the heterogametic sex. We expect  
433 that the sex-specific candidates that occur at and beyond this stringency have a false-positive  
434 rate near zero, because there are no more false-positives for the homogametic sex. However,  
435 at this point we expect to have a high false-negative rate that arises from stochastic absence.  
436 True sex-specific loci are classified as not sex-specific if they are absent in a subset of the  
437 investigated individuals of the respective sex. The slower decay of privacy rarefaction curves  
438 at higher stringencies is due to the dropout of true-positive candidates.

439       As the noisy individual presence-absence is smoothed by aggregation over many  
440 individuals, one may argue that sex-specificity should be scored only for the maximum  
441 possible number of males and females in a dataset. However, this strategy can miss true sex-  
442 specific loci entirely if the data are noisy and true sex-specific loci have inconsistent and low  
443 coverage, e.g. when large genomes with very small sex-specific regions are sequenced at low  
444 depth. But if combinations of fewer males and females are also evaluated, it is possible to find

445 that one sex consistently yields more candidates than the other, which indicates that true  
446 positives exist for that sex. Our script calculates a p-value for the difference between male-  
447 and female-specific candidate counts. Importantly, the privacy rarefaction algorithm per se  
448 can not affect the false-negative rate because it is not based on statistical model assumptions -  
449 false-negatives are given by stochasticity in read presence-absence, i.e. due to the sampling  
450 design, wetlab and in-silico procedures.

451 A recent review discussed six available methods for identification of sex-linked  
452 sequences (Muyle et al. 2017). Our method, the combination of population genomic data  
453 (individual data generated by any sequencing method, e.g. RNA-seq, reduced-representation  
454 libraries, whole-genome) with privacy rarefaction, fills a gap in these existing methods, most  
455 importantly because it does not depend on breeding or an assembled reference genome. Some  
456 of these methods further require prior knowledge of the heterogametic sex and exhaustive  
457 genome sequencing of males and females. Our method is related to the Bayesian  
458 classification algorithm detsex (Gautier 2014) in some of its scope and the required input  
459 data. However, privacy rarefaction is model-free, was here used successful with less than half  
460 of the individuals recommended for detsex (i.e. 10-20 per sex as opposed to >40; Muyle et al.  
461 2017), and copes with very large and noisy datasets with high missingness. Privacy  
462 rarefaction curves thus offer a unique, simple and robust way to judge whether true sex-  
463 specific loci exist and which sex is heterogametic. The established methods for identification  
464 of sex-linked sequences are more suitable for projects that aim to further study previously  
465 identified sex chromosomes, while our approach is efficient in the first phase of investigation  
466 of new species, i.e. rapid de novo-discovery of unknown sex determination systems and  
467 cytogenetically homomorphic sex chromosomes with some of their basic properties. But  
468 privacy rarefaction can also complement more advanced projects, because it identifies sex-

469 specific loci (Y- resp. W-specific loci), a major class of sex-linkage that is neglected by  
470 family segregation analyses due to the lack of recombination.

471         Based on available experience, we expect the power of our method to discover sex-  
472 specific markers and heterogamety to be limited by the true number of sex-specific loci, the  
473 design of population sampling, and the relationship of stochastic noise in genotype presence  
474 (consistency of library preparation and read coverage) to the number of individuals per sex.  
475 The method performs better the more truly sex-specific loci exist, the higher the read  
476 coverage, the more individuals of each sex are included, and the less the population deviates  
477 from panmixia (both family structure and geographic structure should be avoided). For  
478 example, in a species with XY sex-determination, full-sibling males and females do not  
479 contain identical X-chromosomes if their parents carried polymorphic X chromosomes; this  
480 may lead to the apparent paradox of finding both male- and female-specific markers.  
481 However, this was not the case in our analysis of three *Nepenthes* species and *S. latifolia*, in  
482 which female-specific loci were significantly outnumbered by male-specific loci at stringency  
483 levels greater than six, and fell to zero above stringency levels ten or eleven (Figure 1b).  
484 Moreover, our method is robust to modest levels of erroneous gender phenotyping. We  
485 consequently expect privacy rarefaction to be useful for diverse study systems.

#### 486 **Properties of the *Nepenthes* XY system**

487 *Nepenthes* karyotypes suggest that the sex chromosomes are homomorphic (Heubl & Wistuba  
488 1997), matching the relatively lower proportion of Y-specific and sex-associated RAD-tags in  
489 *Nepenthes* compared to *S. latifolia* with its disproportionately large Y-chromosome. Based on  
490 theoretical expectations (above), we interpret the occurrence of true sex-specific markers as  
491 evidence for a single sex-determining genomic region.

492         An expressed gene homologous to *Arabidopsis* DYT1 was found to be male-specific  
493 in both *N. pervillei* and *N. rafflesiana s.l.* PCR tests confirmed that this gene is exclusively

494 amplified in males, but never in females, of 22 *Nepenthes* species. We interpret this result as  
495 evidence for a conserved core of the *Nepenthes* MSY, given that *N. pervillei* and *N.*  
496 *rafflesiana s.l.* span the largest phylogenetic distance in the genus (Meimberg et al. 2001;  
497 Mullins 2000). This shared core MSY further suggests a single common origin of dioecy in  
498 *Nepenthes*. Dioecy most likely evolved after the split of dioecious Nepenthaceae and  
499 hermaphroditic Droseraceae from their most recent common ancestor (MRCA) at 71.1 (CI  
500 44.2-98.0) Mya, and before the MRCA of extant *Nepenthes* at 17.7 (CI 11.0-24.3) Mya (SI  
501 Methods S5). *Nepenthes* does not conform to the view that sex chromosome pairs  
502 increasingly diverge over time (Bachtrog et al. 2014), but rather fall into the category of  
503 lineages with old and homomorphic sex chromosomes (e.g. ratite birds: Vicoso et al. 2013,  
504 brown algae: Ahmed et al. 2014).

505         During the radiation of *Nepenthes*, the MSY has diverged between species. Only six  
506 out of 135 male-specific RAD-tags were shared between *N. rafflesiana s.l.* and *N. gracilis*,  
507 and none were shared with the more distant *N. pervillei*. Male-specific loci shared between *N.*  
508 *pervillei* and *N. rafflesiana s.l.* were only recovered by directly mapping ddRAD reads to the  
509 male inflorescence transcriptome. This suggests that absence of shared sex-specific RAD-tags  
510 should not be interpreted as evidence for independent origins of sex chromosomes. Further  
511 evidence for a common origin but subsequent interspecific divergence of sex chromosomes is  
512 found in a DUF4283-transcript, which was male-specific in *N. gracilis* but sex-associated in  
513 *N. rafflesiana s.l.* Apparently, X and MSY alleles (i.e. gametologs) have lost homology  
514 (threshold 90% identity) in the former but not in the latter species.

515         Apart from sequence divergence, variation in absolute and relative abundance of  
516 male-specific and sex-associated markers is consistent with variation in the size of the MSY  
517 among species, as may be expected in independent evolutionary lineages. Alternatively,  
518 limited overlap in male-specific RAD-tags among species outside a core sex-determining

519 region may be compatible with sex chromosome turnover, where the sex-determining region  
520 translocated into different chromosomal backgrounds (Blaser et al. 2014). Until the genomes  
521 of multiple species have been sequenced and compared, this alternative cannot be fully  
522 excluded. Yet this aspect does not affect our conclusion of a single common origin of the  
523 MSY and dioecy in *Nepenthes*.

#### 524 **Non-coding DNA and special significance of DYT1 and SEP1**

525 Of the 38 sex-linked inflorescence transcripts (identified by 41 matching sex-linked RAD-  
526 tags), 34 (89%) could not be annotated or contained transposable elements (TEs). Thus, the  
527 great majority of sex-linked genomic regions retrieved from *Nepenthes* correspond to non-  
528 coding sequences and TEs, and here they were more common than in non-sex-linked  
529 transcripts ( $\chi^2_{df=1}=5.2$ ,  $p=0.02$ ). Nine out of 13 sex-linked TE-transcripts belonged to a  
530 particular family of TEs, the *gypsy*-like retrotransposons, whereas this family was much less  
531 common among non-sex-linked TE transcripts ( $\chi^2_{df=1}=8.85$ ,  $p=0.003$ ). TE accumulation is  
532 expected in non-recombining regions, and has been reported in species with both  
533 heteromorphic (e.g. *Silene*, Čermák et al. 2008) and homomorphic sex chromosomes (e.g.  
534 Papaya, Wang et al. 2012). The match of a sex-associated RAD-tag in *N. gracilis* to a  
535 mitochondrial NADH-ubiquinone oxidoreductase was unexpected but may represent either an  
536 unspecific match of the short (96 bp) RAD-tag to the inflorescence transcript, or else a cyto-  
537 nuclear transfer to the sex chromosomes. The occurrence of organellar genes on plant sex  
538 chromosomes has been documented in other species (Steflova et al. 2013).

539 Two expressed sex-linked genes are of special interest. First, we identified a  
540 *Nepenthes* homolog of DYT1 as a genus-wide male-specific (MSY) locus. DYT1 is essential  
541 for tapetum development and thus pollen fertility in *A. thaliana* (Zhang et al. 2006), rice (Cai  
542 et al. 2015; Jung et al. 2005; Wilson & Zhang 2009), and tomato (Jeong et al. 2014), and we  
543 speculate that *Nepenthes* DYT1 is also functionally conserved. Direct validation in *Nepenthes*

544 is currently not feasible due to the lack of transformation protocols and the long generation  
545 times. Our analysis suggests that *Nepenthes* DYT1 is absent from females and thus absent  
546 from the X chromosome. Such a deletion of DYT1 from the X chromosome would constitute  
547 a recessive male-sterility mutation, which is required early in the evolution of dioecy for the  
548 transition from a hermaphroditic to a gynodioecious mating system (Charlesworth &  
549 Charlesworth 1978).

550 The second gene of interest is a *Nepenthes* homolog of the homeotic MADS box gene  
551 SEP1, an early-acting regulator of floral organ identity in *Arabidopsis* (Pelaz et al. 2000),  
552 which was sex-associated in *N. pervillei*. There was near-perfect heterozygosity in two SEP1-  
553 linked SNPs in males, whereas these positions were highly homozygous in females,  
554 consistent with a location in little- or non-recombining regions of the X and Y chromosomes  
555 and gametolog sequence divergence. If SEP1 is functionally conserved in *Nepenthes*, a major  
556 component of floral organ development pathways (Theißen et al. 2016) is located on  
557 *Nepenthes* sex chromosomes. We thus hypothesize that SEP1 is involved in unisexual flower  
558 development in *Nepenthes*. In *Silene latifolia*, however, SEP1 homologs are not directly  
559 involved in sex-determination and not located on the sex chromosomes (Matsunaga et al.  
560 2004).

561 The possible roles of DYT1 and SEP1 in the origin of dioecy in *Nepenthes* require  
562 further attention. Even if these genes do not directly determine sex in extant *Nepenthes*, they  
563 may have been involved in sexually antagonistic selection during the evolution of dioecy  
564 because a deletion of DYT1 or alternative SEP1 alleles might abort non-functional organs at  
565 an earlier developmental stage, thus saving resources. However, the completely unisexual  
566 floral morphology of extant *Nepenthes* implies that further genetic differences exist between  
567 males and females.

568 **Ecological causes of dioecy in *Nepenthes***

569 In general, selection for an outcrossing mating system and sexual conflict are hypothesized to  
570 drive transitions from hermaphroditism to dioecy (Charlesworth 1999). The *Drosera* species  
571 of Western Australia can be compared to *Nepenthes*, as their ancestry, life history and  
572 presumably dispersal ability is similar. Most perennial and clonally reproducing Western  
573 Australian *Drosera* are self-incompatible and have higher seed abortion than self-compatible  
574 annual species (Stace et al. 1997). The mechanisms of self-incompatibility are diverse,  
575 suggesting multiple origins or continuing evolution and hence selection for outcrossing due to  
576 high genetic load in these poorly dispersing, clonal plants. Ancient hermaphroditic  
577 Nepenthaceae may have experienced similar pressure to reduce inbreeding.

578         Given the extreme nutrient and light limitation common in carnivorous plants  
579 (Givnish et al. 1984), sexual conflict may have been rather strong in the hermaphrodite  
580 ancestor, assuming that the costs of male and female reproduction differed (Barrett & Hough  
581 2013; Obeso 2002; Zhang et al. 2014). Sexual selection in the form of male–male competition  
582 for ovules may favour higher flower numbers in males, whereas costs associated with the  
583 development of seeds under nutrient limitation might constrain females to a lower optimal  
584 flower number. While male and female reproductive costs and mate competition remain  
585 unexplored in carnivorous plants, in *Nepenthes* they may correspond to the difference in  
586 flower number between the sexes, which also varies between species (SI Table S1).

## 587 **Conclusions**

588 The discovery of XY sex-determination in Nepenthaceae contributes to a better understanding  
589 of the diversity of plant sex determination systems and the molecular and ecological factors  
590 associated with dioecy and the evolution of sex chromosomes. As the foundation has been  
591 laid, future studies can address sexual conflict, X–Y chromosome divergence, and the identity  
592 of sex-determining genes. The species-rich radiation of *Nepenthes* lends itself to comparative  
593 studies. With the development of a simple molecular sexing assay, we also provide a tool for



594 future studies on the ecological and physiological correlates of dioecy in *Nepenthes*, and  
595 anticipate that future work on *Nepenthes* will benefit from this resource. Our work  
596 exemplifies how sex-determination systems of non-model species can be studied and how  
597 statistically supported molecular markers suitable for the identification of sex can be  
598 developed without the need for prior genetic resources or existing breeding efforts.

## 599 **Acknowledgements**

600 We thank N. Zemp for data of *Silene latifolia*. We are indebted to H. Luqman, C. Küffer, J.  
601 Mougat, K. Beaver, C. Morel, E. Nancy, A. Street, and T. Kropf for accessing *N. pervillei*.  
602 A.H.H. Tinggal and I. Daud with family are thanked for hospitality in Brunei, and L.W. Ngai  
603 for assistance with field work in Singapore. The Seychelles Bureau of Standards, the  
604 Seychelles Ministry of Environment and Energy, the Ministry of Industry and Primary  
605 Resources of Brunei Darussalam, the Agri-Food and Veterinary Authority and the National  
606 Parks Board of Singapore kindly granted permits for research, sampling and export of plant  
607 material. C. Michel is thanked for preparing sequencing libraries. S. Hartmeyer and U.  
608 Zimmermann kindly donated samples of sexed *Nepenthes* from their private collections.  
609 Sequencing and computation were carried out with the Genetic Diversity Center Zürich, the  
610 Quantitative Genomics Facility Basel, and the Functional Genomics Center Zürich. We thank  
611 T. Städler and two anonymous reviewers for valuable comments on earlier versions of the  
612 manuscript. This work was supported by ETH Zürich and partly supported through SNF grant  
613 no 31003A\_160123. Keygene N.V. owns patents and patent applications protecting its  
614 Sequence Based Genotyping technologies.

## 615 **Author contributions**

616 M.S. performed the research including data collection and analysis; T.U.G. and F.M.  
617 contributed logistic support and materials; M.S. and A.W. designed and interpreted the  
618 research and wrote the manuscript.

## 619 **Supporting Information**

620 **Table S1** Literature survey of *Nepenthes* inflorescence dimorphism

621 **Table S2** Sex-associated markers

622 **Table S3** Overview table for sex-linked markers in *Nepenthes*

623 **Methods S1** Preliminary molecular sexing assay for *Nepenthes rafflesiana* s.l.

624 **Methods S2** Genotyping of *Silene latifolia*

625 **Methods S3** Male inflorescence transcriptome

626 **Methods S4** A molecular sexing assay for the genus *Nepenthes*

627 **Methods S5** Phylogenetic dating of *Nepenthes*

628

## 629 **Literature Cited**

630 Ahmed S et al. 2014. A haploid system of sex determination in the brown alga *Ectocarpus* sp.

631 Curr Biol. 24:1945–1957. doi: 10.1016/j.cub.2014.07.042.

632 Bachtrog D et al. 2014. Sex determination: Why so many ways of doing it? PLOS Biol.

633 12:e1001899. doi: 10.1371/journal.pbio.1001899.

634 Baird NA et al. 2008. Rapid SNP discovery and genetic mapping using sequenced RAD

635 markers. PLOS ONE. 3:e3376. doi: 10.1371/journal.pone.0003376.

636 Barrett SCH, Hough J. 2013. Sexual dimorphism in flowering plants. J Exp Bot. 64:67–82.

637 doi: 10.1093/jxb/ers308.

638 Benjamini Y, Hochberg Y. 1995. Controlling the false discovery rate: A practical and

639 powerful approach to multiple testing. J R Stat Soc Series B Stat Methodol. 57:289–

640 300.

641 Berset-Brändli L, Jaquiéry J, Dubey S, Perrin N. 2006. A sex-specific marker reveals male

642 heterogamety in European Tree Frogs. Mol Biol Evol. 23:1104–1106. doi:

- 643 10.1093/molbev/msk011.
- 644 Bewick AJ et al. 2013. A large pseudoautosomal region on the sex chromosomes of the frog  
645 *Silurana tropicalis*. *Genome Biol Evol.* 5:1087–1098. doi: 10.1093/gbe/evt073.
- 646 Blaser O, Neuenschwander S, Perrin N, Gardner AEA, Day ET. 2014. Sex-chromosome  
647 turnovers: The hot-potato model. *Am Nat.* 183:140–146. doi: 10.1086/674026.
- 648 Brelsford A, Lavanchy G, Sermier R, Rausch A, Perrin N. 2017. Identifying homomorphic  
649 sex chromosomes from wild-caught adults with limited genomic resources. *Mol Ecol*  
650 *Resour.* 17:752–759. doi: 10.1111/1755-0998.12624.
- 651 Cai C-F et al. 2015. The functional analysis of *OstTDF1* reveals a conserved genetic pathway  
652 for tapetal development between rice and *Arabidopsis*. *Sci Bull.* 60:1073–1082. doi:  
653 10.1007/s11434-015-0810-3.
- 654 Camacho-Sanchez M, Burraco P, Gomez-Mestre I, Leonard JA. 2013. Preservation of RNA  
655 and DNA from mammal samples under field conditions. *Mol Ecol Resour.* 13:663–673.  
656 doi: 10.1111/1755-0998.12108.
- 657 Carmichael SN et al. 2013. Identification of a sex-linked SNP marker in the Salmon Louse  
658 (*Lepeophtheirus salmonis*) using RAD sequencing. *PLOS ONE.* 8:e77832. doi:  
659 10.1371/journal.pone.0077832.
- 660 Čermák T et al. 2008. Survey of repetitive sequences in *Silene latifolia* with respect to their  
661 distribution on sex chromosomes. *Chromosome Res.* 16:961–976. doi: 10.1007/s10577-  
662 008-1254-2.
- 663 Charlesworth B. 1991. The evolution of sex chromosomes. *Science.* 251:1030–1033. doi:  
664 10.2307/2875215.
- 665 Charlesworth B, Charlesworth D. 1978. A model for the evolution of dioecy and gynodioecy.  
666 *Am Nat.* 112:975–997.
- 667 Charlesworth D. 2016. Plant sex chromosomes. *Annu Rev Plant Biol.* 67:397–420. doi:

- 668 10.1146/annurev-arplant-043015-111911.
- 669 Charlesworth D. 2002. Plant sex determination and sex chromosomes. *Heredity*. 88:94–101.
- 670 doi: 10.1038/sj.hdy.6800016.
- 671 Charlesworth D. 1999. Theories of the evolution of dioecy. In: *Gender and Sexual*
- 672 *Dimorphism in Flowering Plants*. Geber, MA, Dawson, TE, & Delph, LF, editors.
- 673 Springer: Berlin, Heidelberg pp. 33–60. doi: 10.1007/978-3-662-03908-3\_2.
- 674 Charlesworth D, Mank JE. 2010. The birds and the bees and the flowers and the trees:
- 675 Lessons from genetic mapping of sex determination in plants and animals. *Genetics*.
- 676 186:9–31. doi: 10.1534/genetics.110.117697.
- 677 Cheek MR, Jebb MHP. 2001. *Nepenthes*. *Flora Malesiana*. 15:1–157.
- 678 Clarke CM. 1997. *Nepenthes of Borneo*. Natural History Publications (Borneo): Kota
- 679 Kinabalu.
- 680 Clarke CM. 2001. *Nepenthes of Sumatra and Peninsular Malaysia*. Natural History
- 681 Publications (Borneo): Kota Kinabalu.
- 682 Clarke CM. 1992. *The ecology of metazoan communities in Nepenthes pitcher plants in*
- 683 *Borneo, with special reference to the community of Nepenthes bicalcarata Hook. f.* *PhD*
- 684 *Thesis*. University of New England: Armidale, Australia.
- 685 Clarke CM, Moran JA, Lee CC. 2011. *Nepenthes baramensis* (Nepenthaceae) - a new species
- 686 from north-western Borneo. *Blumea*. 56:229–233. doi: 10.3767/000651911x607121.
- 687 Cuénoud P et al. 2002. Molecular phylogenetics of Caryophyllales based on nuclear 18S
- 688 rDNA and plastid rbcL, atpB, and matK DNA sequences. *Am J Bot*. 89:132–144. doi:
- 689 10.3732/ajb.89.1.132.
- 690 Danecek P et al. 2011. The variant call format and VCFtools. *Bioinformatics*. 27:2156–2158.
- 691 doi: 10.1093/bioinformatics/btr330.
- 692 Eddy SR, Wheeler TJ, the HMMER development team. HMMER. <http://hmmer.org/>.

- 693 <http://hmmer.org/> (Accessed November 2, 2016).
- 694 Elshire RJ et al. 2011. A robust, simple Genotyping-by-Sequencing (GBS) approach for high  
695 diversity species. PLOS ONE. 6:e19379. doi: 10.1371/journal.pone.0019379.
- 696 Frazier CK. 2001. Pollination and reproductive strategies of *Nepenthes*. In: *Nepenthes of*  
697 *Sumatra and Peninsular Malaysia*. Natural History Publications (Borneo): Kota  
698 Kinabalu pp. 68–73.
- 699 Gamble T et al. 2015. Restriction site-associated DNA sequencing (RAD-seq) reveals an  
700 extraordinary number of transitions among gecko sex-determining systems. Mol Biol  
701 Evol. 32:1296–1309. doi: 10.1093/molbev/msv023.
- 702 Gamble T, Zarkower D. 2014. Identification of sex-specific molecular markers using  
703 restriction site-associated DNA sequencing. Mol Ecol Resour. 14:902–913. doi:  
704 10.1111/1755-0998.12237.
- 705 Gautier M. 2014. Using genotyping data to assign markers to their chromosome type and to  
706 infer the sex of individuals: a Bayesian model-based classifier. Mol Ecol Resour.  
707 14:1141–1159. doi: 10.1111/1755-0998.12264.
- 708 Givnish TJ, Burkhardt EL, Happel RE, Weintraub JD. 1984. Carnivory in the bromeliad  
709 *Brocchinia reducta*, with a cost/benefit model for the general restriction of carnivorous  
710 plants to sunny, moist, nutrient-poor habitats. Am Nat. 124:479–497.
- 711 Gotelli NJ, Colwell RK. 2001. Quantifying biodiversity: Procedures and pitfalls in the  
712 measurement and comparison of species richness. Ecol Lett. 4:379–391. doi:  
713 10.1046/j.1461-0248.2001.00230.x.
- 714 Heikrujam M, Sharma K, Prasad M, Agrawal V. 2015. Review on different mechanisms of  
715 sex determination and sex-linked molecular markers in dioecious crops: a current  
716 update. Euphytica. 201:161–194. doi: 10.1007/s10681-014-1293-z.
- 717 Heubl G, Wistuba A. 1997. A cytological study of the genus *Nepenthes* L. (Nepenthaceae).

- 718           Sendtnera. 4:169–172.
- 719   Jeong H-J et al. 2014. Tomato male sterile 1035 is essential for pollen development and  
720           meiosis in anthers. *J Exp Bot.* 65:6693–6709. doi: 10.1093/jxb/eru389.
- 721   Jung K-H et al. 2005. Rice Undeveloped Tapetum1 is a major regulator of early tapetum  
722           development. *Plant Cell.* 17:2705–2722. doi: 10.1105/tpc.105.034090.
- 723   Juniper BE, Robins RJ, Joel DM. 1989. *The carnivorous plants*. Academic Press: London.
- 724   Kalinowski ST. 2004. Counting alleles with rarefaction: private alleles and hierarchical  
725           sampling designs. *Conserv Genet.* 5:539–543. doi:  
726           10.1023/B:COGE.0000041021.91777.1a.
- 727   Kato M. 1993. Floral biology of *Nepenthes gracilis* (Nepenthaceae) in Sumatra. *Am J Bot.*  
728           80:924–927.
- 729   Kaul RB. 1982. Floral and fruit morphology of *Nepenthes lowii* and *N. villosa*, montane  
730           carnivores of Borneo. *Am J Bot.* 69:793–803. doi: 10.2307/2442970.
- 731   Li H. 2013. Aligning sequence reads, clone sequences and assembly contigs with BWA-  
732           MEM. arXiv:1303.3997 [q-bio]. <http://arxiv.org/abs/1303.3997> (Accessed June 25,  
733           2015).
- 734   Li H et al. 2009. The Sequence Alignment/Map format and SAMtools. *Bioinformatics.*  
735           25:2078–2079. doi: 10.1093/bioinformatics/btp352.
- 736   Mastretta-Yanes A et al. 2015. Restriction site-associated DNA sequencing, genotyping error  
737           estimation and de novo assembly optimization for population genetic inference. *Mol*  
738           *Ecol Resour.* 15:28–41. doi: 10.1111/1755-0998.12291.
- 739   Matsunaga S et al. 2004. Characterization of two SEPALLATA MADS-box genes from the  
740           dioecious plant *Silene latifolia*. *Sex Plant Reprod.* 17:189–193. doi: 10.1007/s00497-  
741           004-0230-z.
- 742   McPherson S. 2011. *New Nepenthes - Volume 1*. Redfern Natural History: Poole.

- 743 McPherson S. 2009. *Pitcher plants of the Old World*. Redfern Natural History: Poole.
- 744 Meimberg H, Wistuba A, Dittrich P, Heubl G. 2001. Molecular phylogeny of Nepenthaceae  
745 based on cladistic analysis of plastid trnK intron sequence data. *Plant Biol.* 3:164–175.  
746 doi: 10.1055/s-2001-12897.
- 747 Mendel JG. 1866. Versuche über Pflanzenhybriden. Verhandlungen des naturforschenden  
748 Vereines in Brünn, Bd. IV für das Jahr 1865, Abhandlungen. 3–47.
- 749 Ming R, Bendahmane A, Renner SS. 2011. Sex chromosomes in land plants. *Annu Rev Plant*  
750 *Biol.* 62:485–514. doi: 10.1146/annurev-arplant-042110-103914.
- 751 Moran JA, Clarke CM. 2010. The carnivorous syndrome in *Nepenthes* pitcher plants. *Plant*  
752 *Signal Behav.* 5:644–648.
- 753 Moran JA, Moran AJ. 1998. Foliar reflectance and vector analysis reveal nutrient stress in  
754 prey-deprived pitcher plants (*Nepenthes rafflesiana*). *Int J Plant Sci.* 159:996–1001.
- 755 Mullins JT. 2000. *Molecular Systematics of Nepenthaceae*. *PhD Thesis*. University of  
756 Reading: Reading, UK.
- 757 Muyle A, Shearn R, Marais GA. 2017. The evolution of sex chromosomes and dosage  
758 compensation in plants. *Genome Biol Evol.* 9:627–645. doi: 10.1093/gbe/evw282.
- 759 Obeso JR. 2002. The costs of reproduction in plants. *New Phytol.* 155:321–348. doi:  
760 10.1046/j.1469-8137.2002.00477.x.
- 761 Orzack SH, Sohn JJ, Kallman KD, Levin SA, Johnston R. 1980. Maintenance of the three sex  
762 chromosome polymorphism in the Platyfish, *Xiphophorus maculatus*. *Evolution.*  
763 34:663–672. doi: 10.2307/2408020.
- 764 Pavlovič A, Saganová M. 2015. A novel insight into the cost–benefit model for the evolution  
765 of botanical carnivory. *Ann Bot.* 115:1075. doi: 10.1093/aob/mcv050.
- 766 Pelaz S, Ditta GS, Baumann E, Wisman E, Yanofsky MF. 2000. B and C floral organ identity  
767 functions require SEPALLATA MADS-box genes. *Nature.* 405:200–203. doi:

- 768 10.1038/35012103.
- 769 Peterson BK, Weber JN, Kay EH, Fisher HS, Hoekstra HE. 2012. Double digest RADseq: An  
770 inexpensive method for de novo SNP discovery and genotyping in model and non-  
771 model species. PLOS ONE. 7:e37135. doi: 10.1371/journal.pone.0037135.
- 772 Purcell S et al. 2007. PLINK: A tool set for whole-genome association and population-based  
773 linkage analyses. Am J Hum Genet. 81:559–575. doi: 10.1086/519795.
- 774 Renner SS. 2014. The relative and absolute frequencies of angiosperm sexual systems:  
775 Dioecy, monoecy, gynodioecy, and an updated online database. Am J Bot. doi:  
776 10.3732/ajb.1400196.
- 777 Renner T, Specht CD. 2011. A sticky situation: Assessing adaptations for plant carnivory in  
778 the Caryophyllales by means of stochastic character mapping. Int J Plant Sci. 172:889–  
779 901. doi: 10.1086/660882.
- 780 Sander van Doorn G, Kirkpatrick M. 2010. Transitions between male and female  
781 heterogamety caused by sex-antagonistic selection. Genetics. 186:629–645. doi:  
782 10.1534/genetics.110.118596.
- 783 Scharmann M, Grafe TU. 2013. Reinstatement of *Nepenthes hemsleyana* (Nepenthaceae), an  
784 endemic pitcher plant from Borneo, with a discussion of associated *Nepenthes* taxa.  
785 Blumea. 58:8–12. doi: 10.3767/000651913X668465.
- 786 Schlüter PM, Harris SA. 2006. Analysis of multilocus fingerprinting data sets containing  
787 missing data. Mol Ecol Notes. 6:569–572. doi: 10.1111/j.1471-8286.2006.01225.x.
- 788 Shimizu KK, Tsuchimatsu T. 2015. Evolution of selfing: Recurrent patterns in molecular  
789 adaptation. Annu Rev Ecol Evol Syst. 46:593–622. doi: 10.1146/annurev-ecolsys-  
790 112414-054249.
- 791 Smit A, Hubley R, Green P. 2013. *RepeatMasker Open-4.0. 2013-2016.*  
792 <http://www.repeatmasker.org>.



- 793 Stace HM, Chen L, James SH. 1997. Self-incompatibility, seed abortion and clonality in the  
794 breeding systems of several Western Australian *Drosera* species (Droseraceae). Aust J  
795 Bot. 45:191–201.
- 796 Steflöva P, Hobza R, Vyskot B, Kejnovsky E. 2013. Strong accumulation of chloroplast DNA  
797 in the Y chromosomes of *Rumex acetosa* and *Silene latifolia*. Cytogenet Genome Res.  
798 142:59–65. doi: 10.1159/000355212.
- 799 Subramanyam K, Narayana LL. 1971. A contribution to the floral anatomy of *Nepenthes*  
800 *khasiana* Hook f. Proc Indian Acad Sci. B. 73:124–131.
- 801 Szpiech ZA, Jakobsson M, Rosenberg NA. 2008. ADZE: A rarefaction approach for counting  
802 alleles private to combinations of populations. Bioinformatics. 24:2498–2504. doi:  
803 10.1093/bioinformatics/btn478.
- 804 The Tree of Sex Consortium. 2014. Tree of sex: A database of sexual systems. Sci Data. 1.  
805 doi: 10.1038/sdata.2014.15.
- 806 Theißen G, Melzer R, Rümpler F. 2016. MADS-domain transcription factors and the floral  
807 quartet model of flower development: linking plant development and evolution.  
808 Development. 143:3259–3271. doi: 10.1242/dev.134080.
- 809 Utsunomia R et al. 2017. Evolution and conservation of *Characidium* sex chromosomes.  
810 Heredity. 119:237–244. doi: 10.1038/hdy.2017.43.
- 811 Vicoso B, Kaiser VB, Bachtrog D. 2013. Sex-biased gene expression at homomorphic sex  
812 chromosomes in emus and its implication for sex chromosome evolution. Proc Natl  
813 Acad Sci U S A. 110:6453–6458. doi: 10.1073/pnas.1217027110.
- 814 Wang J et al. 2012. Sequencing papaya X and Yh chromosomes reveals molecular basis of  
815 incipient sex chromosome evolution. Proc Natl Acad Sci U S A. 109:13710–13715. doi:  
816 10.1073/pnas.1207833109.
- 817 Wilson Sayres MA, Lohmueller KE, Nielsen R. 2014. Natural selection reduced diversity on

818 human Y chromosomes. PLOS Genet. 10:e1004064. doi:  
819 10.1371/journal.pgen.1004064.  
820 Wilson ZA, Zhang D-B. 2009. From *Arabidopsis* to rice: pathways in pollen development. J  
821 Exp Bot. 60:1479–1492. doi: 10.1093/jxb/erp095.  
822 Zhang S, Jiang H, Zhao H, Korpelainen H, Li C. 2014. Sexually different physiological  
823 responses of *Populus cathayana* to nitrogen and phosphorus deficiencies. Tree Physiol.  
824 34:343–354. doi: 10.1093/treephys/tpu025.  
825 Zhang W et al. 2006. Regulation of *Arabidopsis* tapetum development and function by  
826 DYSFUNCTIONAL TAPETUM1 (DYT1) encoding a putative bHLH transcription  
827 factor. Development. 133:3085–3095. doi: 10.1242/dev.02463.  
828  
829  
830  
831  
832  
833  
834  
835  
836  
837  
838  
839  
840  
841  
842

843 **Figures**

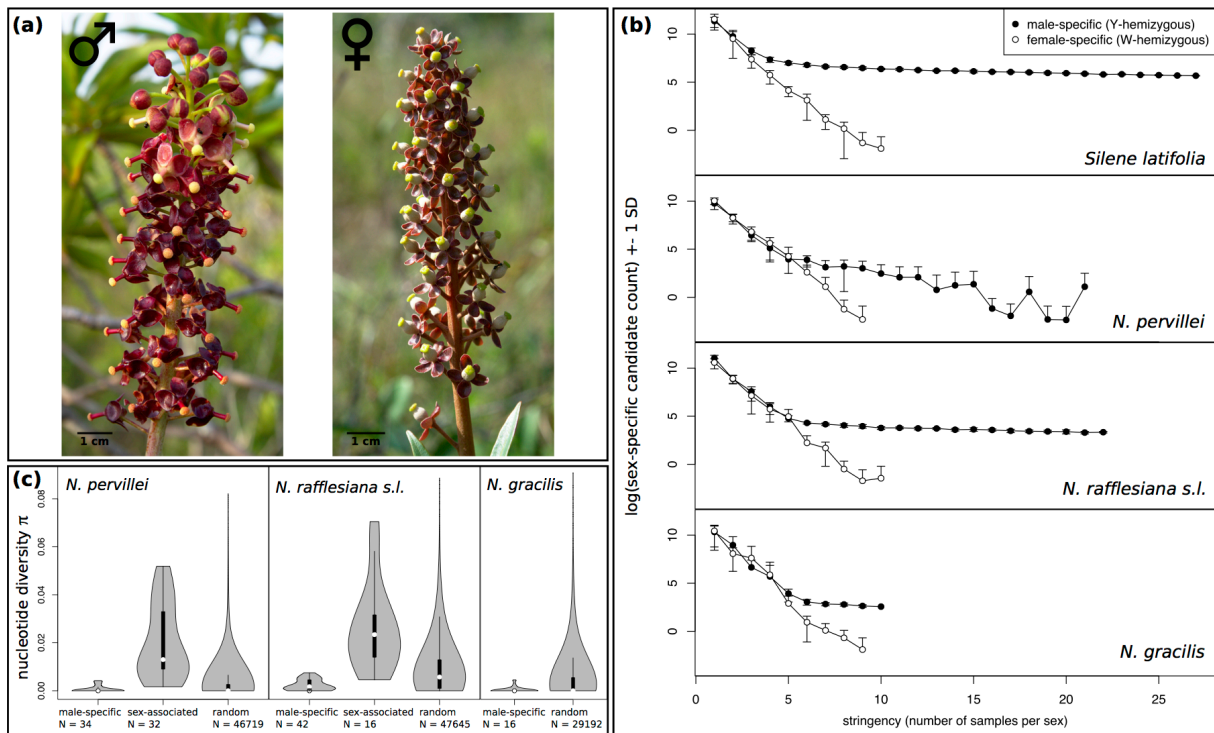

844

845 **Fig. 1** (a) male inflorescence of *N. rafflesiana* s.l. (left) and female inflorescence of *N.*  
 846 *mirabilis* var. *globosa* (right). (b) Evidence for male-specific markers and an XY sex-  
 847 determination system in *Silene latifolia* and three *Nepenthes* spp. (privacy rarefaction curves).  
 848 Shown are counts of sex-specific markers (y-axis) as a function of the number of samples per  
 849 sex used to score sex-specificity (x-axis). Sex-specific markers are defined as RAD-tags with  
 850 mapped reads in all samples from one sex but without any mapped reads in the same number  
 851 of samples from the other sex. Dots represent averages and whiskers one standard deviation  
 852 of 200 bootstrapped combinations of males and females. Note natural log-scale of y-axis and  
 853 hence undefined negative values in SD ranges. (c) Mean per-site nucleotide diversity  $\pi$  of  
 854 RAD-tags in male *Nepenthes* of three taxa for male-specific, sex-associated, and random  
 855 RAD-tags. All RAD-tags mapping 3-75 reads in  $\geq 75\%$  of males per population were  
 856 included. The same sets of individuals are considered in each category. Sex-associated RAD-  
 857 tags were absent in *N. gracilis*. Median = white dot, box = 25%–75% quartiles, whiskers =  
 858  $1.5 \times$  interquartile range, violin = estimated kernel density.

**Methods S1** Preliminary molecular sexing assay for *Nepenthes rafflesiana s.l.*

An initial sequencing library contained a sufficient number of sexed individuals for *Nepenthes rafflesiana s.l.* and *N. gracilis* from Borneo. Collection and DNA extraction are detailed in the main text. We commissioned the Genomic Diversity Facility (Cornell University, Ithaca, NY, USA) with library construction and sequencing, following the GBS protocol (Elshire et al. 2011). After optimisation, the restriction enzyme Sfb1 was chosen and the library was sequenced for 100-bp single-end reads in two Illumina HiSeq lanes.

At this early stage, we employed a simpler version of the resampling approach to detect sex-specific loci, using the Stacks pipeline (Catchen et al. 2013) instead of the dDocent approach (Puritz et al. 2014) of genotyping. The populations module of Stacks was iterated over different combinations of real and permuted males and females, thereby revealing numbers and identities of likely sex-specific loci following the same logic as described in the main text ("privacy-rarefaction"). This attempt was successful in *N. rafflesiana* "typical form" (Borneo), but failed to identify any sex-specific loci in *N. gracilis*. We took the top 10 best candidate loci for *N. rafflesiana* "typical form" (Borneo) and designed PCR primers for validation of sex-specificity (PCR conditions as described in the main text). Two of these loci amplified from males exclusively (private gel band at expected size), as verified in all males that were used for the genotyping and several further samples that had not been used previously. The same markers also amplified specifically from known males but not females of *N. hemsleyana* and *N. rafflesiana* "giant form" (Borneo). However, these markers were unspecific for all other tested species (*N. ampullaria*, *N. bicalcarata*, *N. gracilis*, *N. mirabilis*). We consequently used these two markers to molecularly sex additional individuals of *N. rafflesiana* "typical form" (Borneo) and *N. hemsleyana* that were included in the later, full sample set genotyped with ddRAD-seq. To conclude, the sex of most *N. hemsleyana* and several of the *N. rafflesiana* "typical form" (Borneo) were determined not on the phenotype but molecularly with markers developed through this initial GBS dataset.

## **Methods S2** Genotyping of *Silene latifolia*

Wild populations of *Silene latifolia* were sampled across Switzerland and leaves preserved by drying in silica gel. The phenotypic sex of individuals was recorded. After DNA extraction (Qiagen DNeasy Plant Mini Kit), a set of 95 samples was commissioned for library construction to the Genomic Diversity Facility (Cornell University, Ithaca, NY, USA), following the GBS protocol (Elshire et al. 2011). The restriction enzyme ApeKI was chosen after optimisation. This library was sequenced in two lanes of an Illumina HiSeq to ensure sufficient coverage.

The bioinformatics for *Silene* genotyping were identical to those employed for *Nepenthes*, as outlined in the main text respectively in *Scharmann et al (in revision)*, i.e. *de novo* reference assembly following a modified dDocent pipeline (Puritz et al. 2014), read mapping, variant calling and quality filtering.

### **Methods S3** Male inflorescence transcriptome

Plants of *Nepenthes khasiana* (*in vitro* propagated material from Borneo Exotics (Pvt) Ltd., Sri Lanka) were grown in a greenhouse where they flowered regularly. For the transcriptome of a male inflorescence of *N. khasiana* (length c. 2 cm, many buds of c. 1-3 mm diameter each), we extracted RNA using the Total RNA Mini Kit (Plant) (Geneaid Biotech Ltd, New Taipei City, Taiwan) with the "PRB" lysis buffer, which yielded undegraded high quality RNA (RIN 7.1; Plant RNA Nano Assay, Agilent Bioanalyzer). A cDNA library was generated (NEBNext Ultra Directional RNA Library Prep Kit for Illumina, New England Biolabs, Ipswich MA, USA) and sequenced in one lane of the Illumina MiSeq for 150 bp paired-end reads (GDC ETHZ). A total of 18.7 million PE reads were obtained, and a reference transcriptome was *de novo* assembled by the Trinity pipeline (Grabherr et al. 2011). Best ORFs were extracted by the Transdecoder script.

#### Methods S4 A molecular sexing assay for the genus *Nepenthes*

Based on the evidence for male-specific genomic regions (non-recombining Y-chromosomeal region), we developed an assay to sex *Nepenthes* molecularly. Here we test it with phenotypically sexed individuals from 22 different *Nepenthes* spp. (Methods S4 Table S4-1). The assay is likely applicable to further *Nepenthes* spp., but we recommend to validate it using several phenotypically sexed individuals before application to a novel species.

Methods S4 Table S4-1. *Nepenthes* spp. with phenotypically verified sex used for broader taxonomic validation of a male-specific PCR marker

| species                                | N_male | N_female | source                       |
|----------------------------------------|--------|----------|------------------------------|
| <i>adnata</i>                          | 1      | 1        | cultivated                   |
| <i>albomarginata</i>                   | 1      | 3        | wild populations, cultivated |
| <i>ampullaria</i>                      | 2      | 2        | wild populations             |
| <i>bicalcarata</i>                     | 2      | 2        | wild populations             |
| <i>clipeata</i>                        | 1      | 0        | cultivated                   |
| <i>gracilis</i>                        | 3      | 3        | wild populations, cultivated |
| <i>hemsleyana</i>                      | 2      | 2        | wild populations             |
| <i>khasiana</i>                        | 1      | 0        | cultivated                   |
| <i>maxima</i>                          | 2      | 0        | cultivated                   |
| <i>mira</i>                            | 0      | 1        | cultivated                   |
| <i>mirabilis</i>                       | 3      | 3        | wild populations             |
| <i>mirabilis var. globosa</i>          | 0      | 1        | cultivated                   |
| <i>pervillei</i>                       | 3      | 3        | wild populations             |
| <i>petiolata</i>                       | 0      | 1        | cultivated                   |
| <i>rafflesiana typical form Borneo</i> | 3      | 3        | wild populations             |
| <i>singalana</i>                       | 1      | 0        | cultivated                   |
| <i>talangensis</i>                     | 1      | 0        | cultivated                   |
| <i>tentaculata</i>                     | 1      | 0        | cultivated                   |
| <i>truncata</i>                        | 1      | 0        | cultivated                   |
| <i>veitchii</i>                        | 0      | 1        | cultivated                   |

|                        |   |   |            |
|------------------------|---|---|------------|
| <i>ventricosa</i>      | 0 | 1 | cultivated |
| <i>x trusmadiensis</i> | 1 | 0 | cultivated |

### *DNA extraction*

*Nepenthes* tissue contains substances that strongly inhibit PCR, as simple extraction protocols without purification steps (as suggested by (Hobza & Widmer 2008)) did not yield any amplification. We thus used the silica-column kit NucleoSpin Plant II from Macherey Nagel (Düren, Germany). For optimal yield, the tissue was completely powdered before the lysis step. To achieve this, tissue was flash-frozen in liquid nitrogen and then crushed in disposable, folded paper envelopes using pliers. The resulting coarse powder had to be still frozen, and was transferred to a 2 ml cryotube (Sarstedt No. 72.694.005, Screw Cap Micro Tube, 2 ml, PP, conical and skirted base) with three steel beads. On a shaker mill, cycles of shaking (up to 15 s) and flash-freezing in a liquid nitrogen bath were repeated until the material was a fine dust. Acceleration on the shaker mill was carefully adjusted to the maximum possible level that did not break the frozen cryotubes. Lysis buffer was added directly to the tissue dust without prior thawing. All other steps followed the kit instructions.

### *PCR amplification of control and sex-specific sequences*

The assay involves four primers: one pair targets a male-specific region (within the putative *Nepenthes* ortholog of the *Arabidopsis thaliana* DYT1 gene, 25100\_L96\_2\_F: 5'-AATTCAGTGGATTCGGATCACG-3'; 25100\_L96\_294\_R: 5'-CGATCGCGTCGCAAAGTATG-3'), while the other targets a sequence that is common to both sexes (the mitochondrial *cox1* gene; IP53: 5'-GGAGGAGTTGATTTAGC-3'; *cox1.6KR*: 5'-AAGGCTGGAGGGCTTTGTAC-3'; (Cho et al. 1998)). As suggested by (Hobza & Widmer 2008), the common target is used as an internal control of each reaction. It ensures that poor template quality or other technical issues are recognised as such, instead of confusion with true absence of the sex-specific target, i.e. the expectation for females. The two regions can also be amplified in separate reactions.

The reaction is performed in 15  $\mu$ l volumes containing 2.5 mM MgCl<sub>2</sub>, 250  $\mu$ M of each dNTP, 0.375 units of GoTaq DNA polymerase (Promega, Wisconsin, USA), 1x GoTaq Flexi buffer (Promega), 0.5  $\mu$ M of each of the four primers, and 1  $\mu$ l of template DNA extract (c. 5-20 ng/ $\mu$ l). After initial denaturation for 2 min at 95°C, 30 cycles are run of denaturation for 30s at



95°C, annealing for 30s at 50°C and extension for 1 min at 72°C, followed by a final extension step of 5 min at 72°C (Thermocycler, e.g. Labcycler, SensoQuest, Göttingen, Germany).

*visualisation and scoring*

PCR products are separated in 2% agarose gels and visualised by fluorescent dye (Methods S4 Fig. S4-1). Successful assays contain at least one strong band at 600-700 bp length, corresponding to the control *coxI* fragment. The presence of a strong band at c. 290 bp characterises male individuals, while females do not contain this band. Several other, weaker bands of different length may be present. These are likely unspecific products of the control primer pair, as we could never observe them when applying the sexing primer pair exclusively.

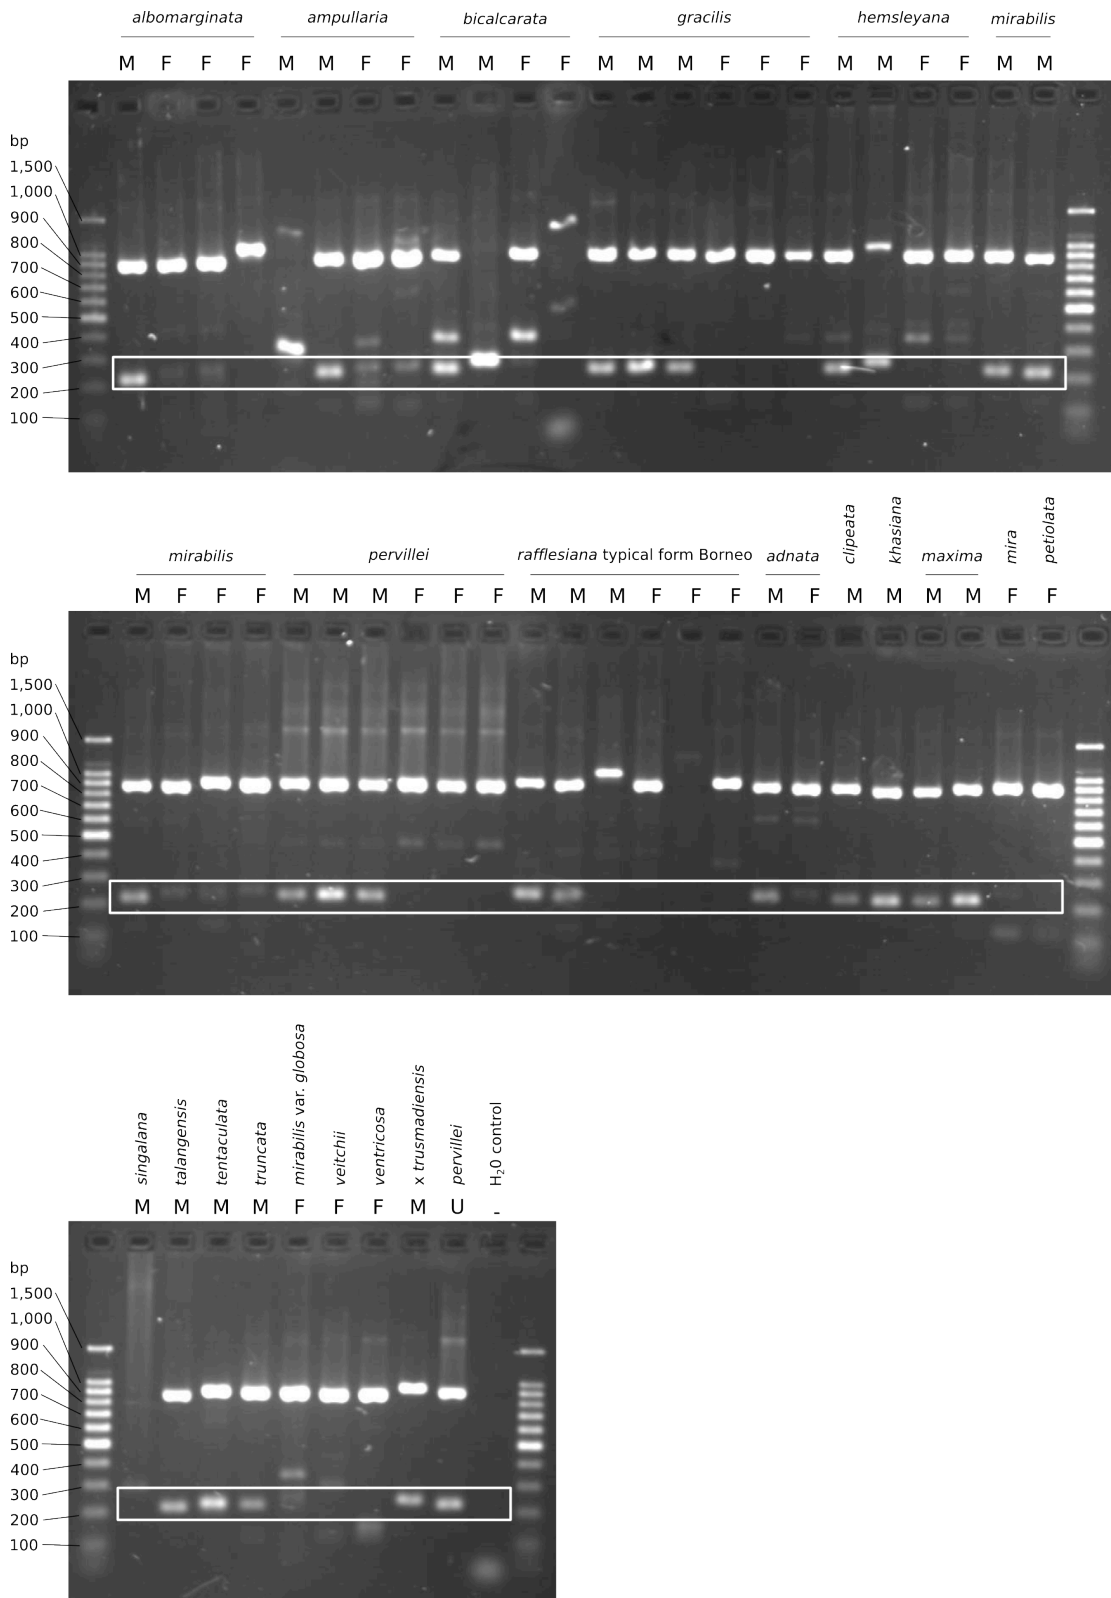

Methods S4 Fig. S4-1. Electrophoretic gel confirming molecular sexing of *Nepenthes* spp. listed in Methods S4 Table S4-1. The region for male-specific bands is highlighted by the white box.

## Methods S5 Phylogenetic dating of *Nepenthes*

### *Materials and method*

We dated the genus *Nepenthes* by combining new transcriptome data for *Nepenthes* with previously published transcriptome data of the Venus Flytrap (*Dionaea muscipula*, (Bemm et al. 2016), a transcriptome-based phylogeny of Caryophyllales (Yang et al. 2015), and dates of Angiosperm diversification (Magallón et al. 2015). *Dionaea* represents Droseraceae, which is among the closest living sister lineages of *Nepenthes* (Brockington et al. 2009; Soltis et al. 2011).

In the first step, transcriptomes of 12 *Nepenthes* spp. (*Scharmann et al in preparation*) were assembled de-novo using Trinity (Grabherr et al. 2011). The raw assembly for *Dionaea* (v1.03) was downloaded from <http://tbro.carnivorom.com/>. We extracted candidate ORFs resp. peptide sequences with TransDecoder.LongOrfs v3.0.0 and TransDecoder.Predict. To reduce the sequence collections even further in a meaningful way, we retained only peptides that were similar (e-value  $\leq 1e-5$ ) to any gene from all available Eudicot plant genome assemblies (NCBI Genbank, accessed 6 June 2016).

In the second step, we emended a taxon-subset of the peptide sequence matrix for the 1,122 genes of (Yang et al. 2015) with orthologs from the *Dionaea* and *Nepenthes* transcriptomes. A custom python script was used to decompose the matrix by gene and taxon using the also available gene model file. The peptide sequences of "*Nepenthes alata* (WQUF)" were used to identify orthologs in the new transcriptomes by reciprocal best hit (blastp) with an e-value cutoff of 0.01. Third, a matrix was re-assembled with 21 of the original taxa and 13 newly added taxa, by globally re-aligning all ortholog peptide sequences of each gene using MUSCLE (Edgar 2004), and concatenation of the alignments. A new gene model file was generated in the process to allow partitioned analysis of the matrix. The new alignment was slightly longer than the original (550,076 instead of 504,850 sites), contained 34 taxa, and 21.7% gap characters. The 13 taxa we added showed very high sequence occupancy, each containing >1,000 of the original 1,122 genes of (Yang et al. 2015).

The maximum likelihood tree was reconstructed with the same method and partitioned by genes as before (RAxML -m PROTCATWAG -q ; Yang et al. 2015). SH-like support was calculated using RAxML -f J option.

We then dated the divergence times on a pruned version of this tree (see below) using the RelTime algorithm (Tamura et al. 2012) as implemented in MEGA-CC (Kumar et al. 2012).

RelTime is a non-Bayesian method for dating of phylogenetic trees that produces estimates similar to those from e.g. BEAST and MCMCtree, but it is orders of magnitudes faster and thus copes with genomics-scale alignments (Mello et al. 2017). The pruned tree contained only Brassicaceae (*Arabidopsis thaliana*) as the outgroup, and hence the alignment given to RelTime was also reduced with the same method as above (32 taxa, 550,360 sites, 22% gaps). We specified the WAG substitution model with 5 gamma-distributed rate categories and invariant sites. For 13 nodes that were also present in the Angiosperm time-tree of Magallón et al. (2015), we supplied absolute time calibrations in the form of upper and lower limits on age (Methods S5 Table S5-1).

Preliminary runs of RAxML and RelTime revealed that inclusion of Fabaceae, Rosaceae and Brassicaceae resulted in the same topology as retrieved by Yang et al. (2015), but enforcing these "Rosids" as a monophyletic outgroup caused RelTime to fit negative branch lengths near the root. However, reducing the outgroup to just Brassicaceae, RAxML found a rather different topology compared to Yang et al. (2015), and to this tree RelTime fitted negative branch lengths among the major lineages of Caryophyllales. Thus, to avoid biologically not interpretable negative branch lengths, we obtained a topology using the three outgroup taxa, but pruned this tree and the alignment to retain only Brassicaceae during RelTime dating.

### *Results and discussion*

We retrieved largely the same topology as Yang et al. (2015) for our subset of Caryophyllales taxa, with full SH-like LRT support for all nodes (tree not shown). The only exception, a grouping of Sarcobataceae as sister to Nyctaginaceae instead of Phytoloccaceae, occurred in a lineage distant to *Nepenthes*. *Nepenthes* was monophyletic and grouped as sister to Droseraceae (*Dionaea muscipula*). This carnivorous lineage was sister to Frankeniaceae-Plumbaginaceae-Polygonaceae as reported before (Yang et al. 2015). The stem age of *Nepenthes* was estimated at 71.1 (CI 44.2 - 98.0) Mya, when it split from its presumed sister Droseraceae. The crown of *Nepenthes* is marked by the most basal species *N. pervillei*, and estimated here at 17.7 (CI 11.0 - 24.3) Mya.

However, we interpret these time estimates with great caution. First, the identity of the closest living relative of *Nepenthes* has not yet reached a consensus. Candidates are the lineage of sticky-leaf carnivores *Drosophyllum* and *Triphyophyllum* and several tropical lianas that appear to have lost carnivory secondarily (Heubl et al. 2006; Renner & Specht 2011), and the

Droseraceae (Brockington et al. 2009; Soltis et al. 2011), or *Nepenthes* may even be basal to both of these (Brockington et al. 2015). We focussed on the Droseraceae because this was the only family for which transcriptome data was available.

Second, the divergence times that we took from the literature (secondary calibrations) may change in the future, as these were based on few genetic loci, fossils may be re-interpreted, and estimation methods change.

All previous attempts of molecular dating in *Nepenthes* (Merckx et al. 2015; Meimberg 2002) involved a presumed *Nepenthes* pollen fossil from the European Eocene (c. 50 million years ago; Krutzsch 1985). However, the attribution of this fossil to an ancestor of recent *Nepenthes* is not justified – it is larger than recent *Nepenthes* pollen but instead fits in the range of Droseraceae (Cheek & Jebb 2001). Thus, Krutzsch's pollen fossils are at best indicative of the European Eocene presence of some lineage with Droseraceae-Nepenthaceae affinity but do not imply an age for modern *Nepenthes*.

Methods S5 Table S5-1. Absolute time calibrations as constraining upper and lower boundaries for the RelTime analysis, taken from Magallón et al. (2015). These are 95% confidence limits for the age (in million years) of the most recent common ancestor (MRCA) of 13 pairs of plant families studied by both Yang et al. (2015) and Magallón et al. (2015).

| <b>MRCA of</b>                  | <b>min time</b> | <b>max time</b> |
|---------------------------------|-----------------|-----------------|
| Cactaceae, Portulacaceae        | 15.08           | 48.15           |
| Cactaceae, Talinaceae           | 18.75           | 53.24           |
| Caryophyllaceae, Amaranthaceae  | 50.34           | 88.56           |
| Cactaceae, Molluginaceae        | 54.22           | 84.99           |
| Phytolaccaceae, Sarcobataceae   | 63.24           | 73.41           |
| Plumbaginaceae, Polygonaceae    | 65.63           | 78.21           |
| Aizoaceae, Nyctaginaceae        | 72.5            | 77.87           |
| Phrymaceae, Solanaceae          | 77              | 103             |
| Frankeniaceae, Plumbaginaceae   | 83              | 101             |
| Caryophyllaceae, Physenaceae    | 90              | 101             |
| Caryophyllaceae, Simmondsiaceae | 95.44           | 105.53          |

|                             |        |        |
|-----------------------------|--------|--------|
| Caryophyllaceae, Solanaceae | 114    | 123    |
| Brassicaceae, Nyctaginaceae | 120.87 | 126.49 |

## References for all Supporting Information Methods

- Bemm F et al. 2016. Venus flytrap carnivorous lifestyle builds on herbivore defense strategies. *Genome Res.* 26:812–825. doi: 10.1101/gr.202200.115.
- Brockington SF et al. 2015. Lineage-specific gene radiations underlie the evolution of novel betalain pigmentation in Caryophyllales. *New Phytol.* 207:1170–1180. doi: 10.1111/nph.13441.
- Brockington SF et al. 2009. Phylogeny of the Caryophyllales sensu lato: Revisiting hypotheses on pollination biology and perianth differentiation in the core Caryophyllales. *Int J Plant Sci.* 170:627–643. doi: 10.1086/597785.
- Catchen J, Hohenlohe PA, Bassham S, Amores A, Cresko WA. 2013. Stacks: An analysis tool set for population genomics. *Mol Ecol.* 22:3124–3140. doi: 10.1111/mec.12354.
- Cheek MR, Jebb MHP. 2001. Nepenthaceae. *Flora Malesiana.* 15:1–157.
- Cho Y, Qiu Y-L, Kuhlman P, Palmer JD. 1998. Explosive invasion of plant mitochondria by a group I intron. *Proc Natl Acad Sci U S A.* 95:14244–14249.
- Edgar RC. 2004. MUSCLE: Multiple sequence alignment with high accuracy and high throughput. *Nucl Acids Res.* 32:1792–1797. doi: 10.1093/nar/gkh340.
- Elshire RJ et al. 2011. A robust, simple Genotyping-by-Sequencing (GBS) approach for high diversity species. *PLOS ONE.* 6:e19379. doi: 10.1371/journal.pone.0019379.
- Grabherr MG et al. 2011. Full-length transcriptome assembly from RNA-Seq data without a reference genome. *Nat Biotech.* 29:644–652. doi: 10.1038/nbt.1883.
- Heubl G, Bringmann G, Meimberg H. 2006. Molecular phylogeny and character evolution of carnivorous plant families in Caryophyllales - revisited. *Plant Biol.* 8:821–830. doi: 10.1055/s-2006-924460.
- Hobza R, Widmer A. 2008. Efficient molecular sexing in dioecious *Silene latifolia* and *S. dioica* and paternity analysis in F1 hybrids. *Mol Ecol Resour.* 8:1274–1276. doi: 10.1111/j.1755-0998.2008.02344.x.
- Krutzsch W. 1985. Über *Nepenthes*-Pollen (alias ‘*Droseridites*’ p.p.) im europäischen Tertiär. *Gleditschia.* 13:89–93.
- Kumar S, Stecher G, Peterson D, Tamura K. 2012. MEGA-CC: Computing core of molecular evolutionary genetics analysis program for automated and iterative data analysis. *Bioinformatics.* 28:2685–2686. doi: 10.1093/bioinformatics/bts507.
- Magallón S, Gómez-Acevedo S, Sánchez-Reyes LL, Hernández-Hernández T. 2015. A metacalibrated time-tree documents the early rise of flowering plant phylogenetic diversity. *New Phytol.* 207:437–453. doi: 10.1111/nph.13264.

- Meimberg H. 2002. *Molekular-Systematische Untersuchungen an den Familien Nepenthaceae und Ancistrocladaceae sowie verwandter Taxa aus der Unterklasse Caryophyllidae s. l.* PhD Thesis. Ludwig-Maximilians-Universität München: München, Germany.
- Mello B, Tao Q, Tamura K, Kumar S. 2017. Fast and accurate estimates of divergence times from big data. *Mol Biol Evol.* 34:45–50. doi: 10.1093/molbev/msw247.
- Merckx VSFT et al. 2015. Evolution of endemism on a young tropical mountain. *Nature.* 524:347–350. doi: 10.1038/nature14949.
- Puritz JB, Hollenbeck CM, Gold JR. 2014. dDocent: A RADseq, variant-calling pipeline designed for population genomics of non-model organisms. *PeerJ.* 2:e431. doi: 10.7717/peerj.431.
- Renner T, Specht CD. 2011. A sticky situation: Assessing adaptations for plant carnivory in the Caryophyllales by means of stochastic character mapping. *Int J Plant Sci.* 172:889–901. doi: 10.1086/660882.
- Soltis DE et al. 2011. Angiosperm phylogeny: 17 genes, 640 taxa. *Am J Bot.* 98:704–730. doi: 10.3732/ajb.1000404.
- Tamura K et al. 2012. Estimating divergence times in large molecular phylogenies. *Proc Natl Acad Sci U S A.* 109:19333–19338. doi: 10.1073/pnas.1213199109.
- Yang Y et al. 2015. Dissecting molecular evolution in the highly diverse plant clade Caryophyllales using transcriptome sequencing. *Mol Biol Evol.* 32:2001–2014. doi: 10.1093/molbev/msv081.
